# Supplementary material for: Reduced Resting-State EEG Power Spectra and Functional Connectivity after 24 and 36 Hours of Sleep Deprivation
Source: MDPI journal article supplement (doi:10.3390/brainsci13060949), 2023-06-14
Supplement: s1 [file s1]

Table S1. 81 pairs of significant functionally connected brain regions and *t* values for baseline and 24 hours of sleep deprivation.

| Number | Brain region one  | Brain region two     | <i>t</i> |
|--------|-------------------|----------------------|----------|
| 1      | Frontal_Sup_L     | Frontal_Sup_R        | 5.689    |
| 2      | Frontal_Sup_R     | Frontal_Sup_Orb_L    | 4.827    |
| 3      | Frontal_Sup_R     | Frontal_Mid_L        | 5.535    |
| 4      | Frontal_Sup_L     | Frontal_Mid_R        | 5.741    |
| 5      | Frontal_Mid_L     | Frontal_Mid_R        | 5.404    |
| 6      | Frontal_Sup_R     | Frontal_Mid_Orb_L    | 5.300    |
| 7      | Frontal_Mid_R     | Frontal_Mid_Orb_L    | 4.440    |
| 8      | Frontal_Sup_L     | Frontal_Mid_Orb_R    | 5.462    |
| 9      | Frontal_Sup_R     | Frontal_Inf_Tri_L    | 5.387    |
| 10     | Frontal_Mid_R     | Frontal_Inf_Tri_L    | 4.912    |
| 11     | Frontal_Sup_L     | Frontal_Inf_Tri_R    | 5.333    |
| 12     | Frontal_Mid_L     | Frontal_Inf_Tri_R    | 4.959    |
| 13     | Frontal_Sup_R     | Frontal_Inf_Orb_L    | 4.976    |
| 14     | Frontal_Sup_Orb_L | Supp_Motor_Area_L    | 4.504    |
| 15     | Frontal_Mid_Orb_L | Supp_Motor_Area_L    | 4.906    |
| 16     | Frontal_Inf_Orb_L | Supp_Motor_Area_L    | 4.426    |
| 17     | Frontal_Sup_L     | Supp_Motor_Area_R    | 4.229    |
| 18     | Frontal_Sup_Orb_L | Supp_Motor_Area_R    | 5.001    |
| 19     | Frontal_Mid_Orb_L | Supp_Motor_Area_R    | 5.472    |
| 20     | Frontal_Inf_Orb_L | Supp_Motor_Area_R    | 4.729    |
| 21     | Frontal_Mid_R     | Frontal_Sup_Medial_L | 4.316    |
| 22     | Frontal_Sup_L     | Frontal_Sup_Medial_R | 4.619    |
| 23     | Frontal_Sup_R     | Frontal_Mid_Orb_L    | 4.347    |
| 24     | Supp_Motor_Area_R | Cingulum_Post_L      | 4.445    |
| 25     | Rolandic_Oper_R   | Cuneus_L             | 4.469    |
| 26     | Cingulum_Mid_R    | Cuneus_L             | 4.433    |
| 27     | Frontal_Sup_R     | Occipital_Sup_L      | 4.409    |
| 28     | Rolandic_Oper_R   | Occipital_Sup_L      | 4.650    |
| 29     | Supp_Motor_Area_L | Occipital_Sup_L      | 4.196    |
| 30     | Supp_Motor_Area_R | Occipital_Sup_L      | 4.152    |
| 31     | Cingulum_Mid_R    | Occipital_Sup_L      | 4.680    |
| 32     | Cingulum_Mid_L    | Occipital_Sup_R      | 4.159    |
| 33     | Supp_Motor_Area_R | Occipital_Mid_L      | 4.407    |
| 34     | Rolandic_Oper_R   | Occipital_Mid_R      | 4.165    |
| 35     | Supp_Motor_Area_L | Occipital_Mid_R      | 4.567    |
| 36     | Cingulum_Post_L   | Postcentral_R        | 4.458    |
| 37     | Cuneus_L          | Postcentral_R        | 4.390    |
| 38     | Occipital_Sup_L   | Postcentral_R        | 5.000    |
| 39     | Frontal_Sup_R     | Parietal_Sup_L       | 4.451    |
| 40     | Frontal_Inf_Orb_R | Parietal_Sup_L       | 4.353    |

|    |                   |                     |       |
|----|-------------------|---------------------|-------|
| 41 | Rolandic_Oper_R   | Parietal_Sup_L      | 4.563 |
| 42 | Olfactory_R       | Parietal_Sup_L      | 4.212 |
| 43 | Occipital_Mid_R   | Parietal_Sup_L      | 4.782 |
| 44 | Occipital_Sup_L   | Parietal_Sup_R      | 5.105 |
| 45 | Frontal_Sup_R     | Parietal_Inf_L      | 4.340 |
| 46 | Occipital_Mid_R   | Parietal_Inf_L      | 5.297 |
| 47 | Occipital_Inf_R   | Parietal_Inf_L      | 4.183 |
| 48 | Fusiform_R        | Parietal_Inf_L      | 4.634 |
| 49 | Cuneus_L          | Parietal_Inf_R      | 4.747 |
| 50 | Occipital_Sup_L   | Parietal_Inf_R      | 5.232 |
| 51 | Cingulum_Post_L   | SupraMarginal_R     | 4.564 |
| 52 | Cuneus_L          | SupraMarginal_R     | 5.255 |
| 53 | Cuneus_R          | SupraMarginal_R     | 4.127 |
| 54 | Occipital_Sup_L   | SupraMarginal_R     | 5.197 |
| 55 | Frontal_Sup_R     | Angular_L           | 4.682 |
| 56 | Frontal_Mid_R     | Angular_L           | 4.113 |
| 57 | Occipital_Mid_R   | Angular_L           | 4.171 |
| 58 | SupraMarginal_R   | Angular_L           | 4.147 |
| 59 | Cuneus_L          | Angular_R           | 4.484 |
| 60 | Occipital_Sup_L   | Angular_R           | 4.592 |
| 61 | Angular_L         | Angular_R           | 4.408 |
| 62 | Rolandic_Oper_R   | Precuneus_L         | 4.420 |
| 63 | Occipital_Sup_R   | Precuneus_L         | 4.467 |
| 64 | SupraMarginal_R   | Precuneus_L         | 4.663 |
| 65 | Parietal_Sup_L    | Temporal_Sup_R      | 5.639 |
| 66 | Parietal_Inf_L    | Temporal_Sup_R      | 4.694 |
| 67 | Precuneus_L       | Temporal_Sup_R      | 4.335 |
| 68 | Temporal_Sup_L    | Temporal_Sup_R      | 4.131 |
| 69 | Parietal_Sup_L    | Temporal_Pole_Sup_R | 4.256 |
| 70 | Supp_Motor_Area_L | Temporal_Mid_L      | 4.276 |
| 71 | Supp_Motor_Area_R | Temporal_Mid_L      | 4.997 |
| 72 | ParaHippocampal_L | Temporal_Mid_R      | 4.362 |
| 73 | ParaHippocampal_R | Temporal_Mid_R      | 4.236 |
| 74 | Parietal_Sup_L    | Temporal_Mid_R      | 4.746 |
| 75 | Parietal_Inf_L    | Temporal_Mid_R      | 4.802 |
| 76 | Angular_L         | Temporal_Mid_R      | 4.216 |
| 77 | Temporal_Sup_L    | Temporal_Mid_R      | 4.632 |
| 78 | Supp_Motor_Area_L | Temporal_Pole_Mid_L | 4.485 |
| 79 | Occipital_Mid_R   | Temporal_Pole_Mid_R | 4.167 |
| 80 | Parietal_Sup_L    | Temporal_Pole_Mid_R | 4.643 |
| 81 | Parietal_Inf_L    | Temporal_Inf_R      | 4.664 |

---

Table S2. 69 pairs of significant functionally connected brain regions and t values for baseline and 36 hours of sleep deprivation.

| Number | Brain region one  | Brain region two     | <i>t</i> |
|--------|-------------------|----------------------|----------|
| 1      | Frontal_Sup_L     | Frontal_Sup_R        | 4.995    |
| 2      | Frontal_Sup_R     | Frontal_Mid_L        | 5.268    |
| 3      | Frontal_Sup_L     | Frontal_Mid_R        | 5.597    |
| 4      | Frontal_Mid_L     | Frontal_Mid_R        | 4.975    |
| 5      | Frontal_Sup_L     | Frontal_Mid_Orb_R    | 4.531    |
| 6      | Frontal_Sup_R     | Frontal_Inf_Tri_L    | 4.313    |
| 7      | Frontal_Sup_L     | Frontal_Inf_Tri_R    | 4.367    |
| 8      | Frontal_Mid_L     | Frontal_Inf_Tri_R    | 4.960    |
| 9      | Frontal_Mid_Orb_R | Frontal_Inf_Orb_L    | 4.502    |
| 10     | Frontal_Sup_Orb_R | Rolandic_Oper_L      | 4.257    |
| 11     | Frontal_Inf_Orb_R | Rolandic_Oper_L      | 4.424    |
| 12     | Frontal_Inf_Orb_R | Olfactory_L          | 4.731    |
| 13     | Frontal_Mid_Orb_R | Frontal_Mid_Orb_L    | 4.824    |
| 14     | Frontal_Mid_Orb_R | Rectus_L             | 4.697    |
| 15     | Frontal_Mid_Orb_R | Insula_L             | 4.569    |
| 16     | Frontal_Inf_Orb_R | Insula_L             | 4.459    |
| 17     | Rolandic_Oper_R   | Cingulum_Post_L      | 4.320    |
| 18     | Rolandic_Oper_R   | Cuneus_L             | 4.512    |
| 19     | Rolandic_Oper_R   | Cuneus_R             | 4.903    |
| 20     | Rolandic_Oper_R   | Occipital_Sup_L      | 4.136    |
| 21     | Supp_Motor_Area_R | Occipital_Sup_L      | 4.611    |
| 22     | Rolandic_Oper_R   | Occipital_Sup_R      | 4.143    |
| 23     | Fusiform_R        | Postcentral_L        | 4.495    |
| 24     | Frontal_Sup_R     | Parietal_Sup_L       | 4.482    |
| 25     | Frontal_Mid_Orb_R | Parietal_Sup_L       | 4.360    |
| 26     | Frontal_Inf_Orb_R | Parietal_Sup_L       | 4.164    |
| 27     | Frontal_Mid_Orb_R | Parietal_Sup_R       | 4.142    |
| 28     | Frontal_Inf_Orb_R | Parietal_Sup_R       | 4.133    |
| 29     | Cingulum_Post_L   | SupraMarginal_R      | 5.666    |
| 30     | Cingulum_Post_R   | SupraMarginal_R      | 5.105    |
| 31     | Cuneus_L          | SupraMarginal_R      | 4.753    |
| 32     | Cuneus_R          | SupraMarginal_R      | 4.351    |
| 33     | Occipital_Sup_L   | SupraMarginal_R      | 4.582    |
| 34     | SupraMarginal_R   | Precuneus_L          | 4.224    |
| 35     | SupraMarginal_R   | Precuneus_R          | 4.213    |
| 36     | SupraMarginal_R   | Paracentral_Lobule_L | 4.354    |
| 37     | SupraMarginal_R   | Paracentral_Lobule_R | 4.270    |
| 38     | Frontal_Inf_Orb_R | Putamen_L            | 4.203    |
| 39     | Frontal_Mid_Orb_R | Temporal_Sup_L       | 4.126    |
| 40     | Occipital_Inf_R   | Temporal_Sup_L       | 4.541    |

|    |                     |                     |       |
|----|---------------------|---------------------|-------|
| 41 | Precentral_L        | Temporal_Sup_R      | 4.112 |
| 42 | Frontal_Inf_Oper_L  | Temporal_Sup_R      | 4.141 |
| 43 | Frontal_Inf_Orb_R   | Temporal_Sup_R      | 4.340 |
| 44 | Olfactory_R         | Temporal_Sup_R      | 4.125 |
| 45 | Cuneus_L            | Temporal_Sup_R      | 4.227 |
| 46 | Temporal_Sup_R      | Temporal_Pole_Sup_R | 4.107 |
| 47 | Occipital_Inf_R     | Temporal_Mid_L      | 4.552 |
| 48 | Frontal_Sup_L       | Temporal_Mid_R      | 4.224 |
| 49 | Frontal_Inf_Orb_R   | Temporal_Mid_R      | 4.779 |
| 50 | Rolandic_Oper_L     | Temporal_Mid_R      | 4.157 |
| 51 | Supp_Motor_Area_R   | Temporal_Mid_R      | 4.144 |
| 52 | Olfactory_R         | Temporal_Mid_R      | 4.395 |
| 53 | Temporal_Pole_Sup_R | Temporal_Mid_R      | 4.594 |
| 54 | Precentral_L        | Temporal_Pole_Mid_R | 4.218 |
| 55 | Temporal_Mid_R      | Temporal_Pole_Mid_R | 4.536 |
| 56 | Frontal_Mid_Orb_R   | Temporal_Inf_L      | 4.179 |
| 57 | Precentral_L        | Temporal_Inf_R      | 5.055 |
| 58 | Frontal_Sup_L       | Temporal_Inf_R      | 4.192 |
| 59 | Frontal_Sup_Orb_R   | Temporal_Inf_R      | 4.161 |
| 60 | Frontal_Mid_Orb_R   | Temporal_Inf_R      | 4.739 |
| 61 | Frontal_Inf_Orb_R   | Temporal_Inf_R      | 5.228 |
| 62 | Rolandic_Oper_L     | Temporal_Inf_R      | 4.637 |
| 63 | Olfactory_L         | Temporal_Inf_R      | 4.635 |
| 64 | Rectus_R            | Temporal_Inf_R      | 4.181 |
| 65 | Postcentral_L       | Temporal_Inf_R      | 5.068 |
| 66 | Parietal_Inf_L      | Temporal_Inf_R      | 4.221 |
| 67 | Temporal_Sup_L      | Temporal_Inf_R      | 4.664 |
| 68 | Temporal_Mid_L      | Temporal_Inf_R      | 4.290 |
| 69 | Temporal_Pole_Mid_R | Temporal_Inf_R      | 4.261 |

---
